# Supplementary material
Source: PubMed Central journal article supplement (PMC3468711)
Supplement: NIHMS374299-supplement-Suppl_Table.pdf [file NIHMS374299-supplement-Suppl_Table.pdf]

| Model     | Time Scale    | Covariates                                   | Absolute Bias | MSE      | Coverage | Power |
|-----------|---------------|----------------------------------------------|---------------|----------|----------|-------|
| Model t1  | Time on study | P(t)                                         | 0.009226756   | 0.000253 | 0.94     | 0.14  |
| Model t2  | Time on study | age + P(t)                                   | 0.009437058   | 0.000258 | 0.93     | 0.18  |
| Model t3  | Time on study | age + age <sup>2</sup> + P(t)                | 0.009452858   | 0.000257 | 0.94     | 0.18  |
| Model t4  | Time on study | strata(age) + P(t)                           | 0.009602658   | 0.000261 | 0.94     | 0.18  |
| Model t5  | Time on study | cy + P(t)                                    | 0.009269333   | 0.000254 | 0.94     | 0.15  |
| Model t6  | Time on study | strata(cy) + P(t)                            | 0.009259069   | 0.000256 | 0.93     | 0.14  |
| Model t7  | Time on study | age + cy + P(t)                              | 0.009481643   | 0.000259 | 0.93     | 0.18  |
| Model t8  | Time on study | age + age <sup>2</sup> + cy + P(t)           | 0.009498923   | 0.000259 | 0.94     | 0.17  |
| Model t9  | Time on study | strata(age)+cy+P(t)                          | 0.009637527   | 0.000262 | 0.94     | 0.18  |
| Model t10 | Time on study | strata(cy) + age + P(t)                      | 0.009468184   | 0.000261 | 0.93     | 0.17  |
| Model t11 | Time on study | strata(cy) + age + age <sup>2</sup> + P(t)   | 0.009480017   | 0.00026  | 0.94     | 0.16  |
| Model t12 | Time on study | strata(age,cy) + P(t)                        | 0.009784825   | 0.000269 | 0.93     | 0.16  |
| Model a1  | Age           | strata(bc)+P(a)                              | 0.009471055   | 0.000259 | 0.93     | 0.16  |
| Model a2  | Age           | strata(bc)+tos + P(a)                        | 0.009930321   | 0.000274 | 0.94     | 0.19  |
| Model a3  | Age           | strata(bc,tos) + P(a)                        | 0.009826216   | 0.000278 | 0.95     | 0.17  |
| Model a4  | Age           | strata(bc)+cy + P(a)                         | 0.009432122   | 0.00026  | 0.93     | 0.16  |
| Model a5  | Age           | strata(bc)+tos + cy + P(a)                   | 0.009997289   | 0.000276 | 0.93     | 0.18  |
| Model a6  | Age           | strata(bc,tos)+cy+P(a)                       | 0.009842521   | 0.000279 | 0.95     | 0.16  |
| Model c1  | Calendar Time | P(cy)                                        | 0.009005151   | 0.000245 | 0.94     | 0.17  |
| Model c2  | Calendar Time | age + P(cy)                                  | 0.009201348   | 0.000251 | 0.93     | 0.18  |
| Model c3  | Calendar Time | age + age <sup>2</sup> + P(cy)               | 0.009176489   | 0.00025  | 0.94     | 0.17  |
| Model c4  | Calendar Time | strata(age) + P(cy)                          | 0.009206916   | 0.000253 | 0.94     | 0.16  |
| Model c5  | Calendar Time | tos + P(cy)                                  | 0.009335282   | 0.000259 | 0.94     | 0.15  |
| Model c6  | Calendar Time | strata(tos) + P(cy)                          | 0.009100997   | 0.000252 | 0.94     | 0.15  |
| Model c7  | Calendar Time | age + tos + P(cy)                            | 0.009547114   | 0.000265 | 0.93     | 0.18  |
| Model c8  | Calendar Time | age + age <sup>2</sup> + tos + P(cy)         | 0.009562493   | 0.000265 | 0.93     | 0.17  |
| Model c9  | Calendar Time | strata(age)+tos+P(cy)                        | 0.009626574   | 0.000267 | 0.94     | 0.15  |
| Model c10 | Calendar Time | strata(tos) + age + P(cy)                    | 0.009327419   | 0.000258 | 0.93     | 0.18  |
| Model c11 | Calendar Time | strata(tos) + age + age <sup>2</sup> + P(cy) | 0.009325014   | 0.000257 | 0.94     | 0.17  |
| Model c12 | Calendar Time | strata(age,tos) + P(cy)                      | 0.009542158   | 0.000266 | 0.92     | 0.18  |
